# Inorganic Polyphosphate Suppresses Lipopolysaccharide-Induced Inducible Nitric Oxide Synthase (iNOS) Expression in Macrophages

Kana Harada<sup>1\*</sup>, Toshikazu Shiba<sup>2,3</sup>, Kazuya Doi<sup>1</sup>, Koji Morita<sup>1</sup>, Takayasu Kubo<sup>1</sup>, Yusuke Makihara<sup>1</sup>, Adriano Piattelli<sup>4</sup>, Yasumasa Akagawa<sup>1</sup>

**1** Department of Advanced Prosthodontics, Institute of Biomedical and Health Sciences, Hiroshima University, Hiroshima, Japan, **2** Regenetiss Inc., Koganei, Japan, **3** Laboratory for Polyphosphate Research, The Kitasato Institute, Kitasato Institute for Life Sciences, Kitasato University, Tokyo, Japan, **4** Department of Medical, Oral and Biotechnological Sciences, Chieti-Pescara University, Chieti, Italy

## Abstract

In response to infection, macrophages produce a series of inflammatory mediators, including nitric oxide (NO), to eliminate pathogens. The production of these molecules is tightly regulated via various mechanisms, as excessive responses are often detrimental to host tissues. Here, we report that inorganic polyphosphate [poly(P)], a linear polymer of orthophosphate ubiquitously found in mammalian cells, suppresses inducible nitric oxide synthase (iNOS) expression induced by lipopolysaccharide (LPS), a cell wall component of Gram-negative bacteria, in mouse peritoneal macrophages. Poly(P) with longer chains is more potent than those with shorter chains in suppressing LPS-induced iNOS expression. In addition, poly(P) decreased LPS-induced NO release. Moreover, poly(P) suppressed iNOS mRNA expression induced by LPS stimulation, thereby indicating that poly(P) reduces LPS-induced iNOS expression by down-regulation at the mRNA level. In contrast, poly(P) did not affect the LPS-induced release of TNF, another inflammatory mediator. Poly(P) may serve as a regulatory factor of innate immunity by modulating iNOS expression in macrophages.

**Citation:** Harada K, Shiba T, Doi K, Morita K, Kubo T, et al. (2013) Inorganic Polyphosphate Suppresses Lipopolysaccharide-Induced Inducible Nitric Oxide Synthase (iNOS) Expression in Macrophages. PLoS ONE 8(9): e74650. doi:10.1371/journal.pone.0074650

**Editor:** Paul G. Thomas, St. Jude Children's Research Hospital, United States of America

**Received:** December 7, 2012; **Accepted:** August 8, 2013; **Published:** September 9, 2013

**Copyright:** © 2013 Harada et al. This is an open-access article distributed under the terms of the Creative Commons Attribution License, which permits unrestricted use, distribution, and reproduction in any medium, provided the original author and source are credited.

**Funding:** This study was supported by a Grant-in-Aid for Scientific Research (No. 23890134) from Japan Society for the Promotion of Science. The funders had no role in study design, data collection and analysis, decision to publish, or preparation of the manuscript.

**Competing Interests:** One of the authors, T. Shiba, is the president of Regenetiss Inc. This does not alter the authors' adherence to all the PLOS ONE policies on sharing data and materials.

\* E-mail: haradak1289@hiroshima-u.ac.jp

## Introduction

Inorganic polyphosphate [poly(P)] is a linear polymer composed of tens to hundreds of orthophosphate (Pi) residues linked by high-energy phosphate bonds and widely found in organisms ranging from bacteria to mammals [1]. In prokaryotes and lower eukaryotes, poly(P) plays a critical role in survival by providing phosphate and energy, chelating heavy metals, buffering alkaline stress, regulating gene expression and forming channels [1]. Roles of poly(P) in mammals, including humans, have been revealed in the last decade. We previously found that poly(P) stimulates cell proliferation by stabilizing the binding of fibroblast growth factor-2 to its receptors [2] and also induces the differentiation and calcification of osteoblasts [3,4]. In the blood coagulation system, poly(P) acts as a procoagulant mediator after release from platelet granules [5–9]. Moreover, it has been reported that poly(P) is involved in the function of transient receptor potential ankyrin 1 and transient receptor potential melastatin 8 [10,11], cell apoptosis [12], activation of mammalian target of rapamycin (mTOR) [13], and energy metabolism [14]. However, despite the ubiquitous distribution of poly(P) in tissues and cells, including brain, heart, kidney, lung, liver, plasma, peripheral blood mononuclear cells, and mast cells [15–17], current knowledge pertaining to the

functions of poly(P) is limited. This prompted us to further investigate the functions of poly(P).

Upon infection, macrophages sense pathogen-associated molecular patterns through a family of pattern-recognition receptors and activate the immune system [18,19]. Lipopolysaccharide (LPS), which is closely associated with infectious diseases such as sepsis and periodontal diseases, is a cell wall component of Gram-negative bacteria and it is recognized by macrophages via Toll-like receptor 4 (TLR4) [18,19]. The activation of TLR4 in macrophages results in the induction of inflammatory genes such as tumor necrosis factor, interleukins and inducible nitric oxide synthase (iNOS) [20]. These molecules are essential for host defense against infection. For instance, macrophages engulf pathogens and destroy them with nitric oxide (NO) produced by iNOS [21]. However, excessive amounts of NO are also detrimental to host tissues and cells and implicated in the pathology of various diseases. Thus, NO production by iNOS is tightly regulated at the level of transcription, translation, posttranslational modification and iNOS activity [22].

In the present study, we investigated the effect of extracellular poly(P) on iNOS expression and TNF release in mouse peritoneal macrophages. Our results demonstrate that poly(P) suppresses iNOS expression and NO release but not TNF release in LPS-activated macrophages. We observed that poly(P)-mediated

suppression of iNOS expression was regulated at the level of mRNA expression.

## Materials and Methods

### Ethics statement

This study was performed in accordance with Guidelines for Animal Experimentation, Hiroshima University, and approved by the Committee of Animal Experimentation, Hiroshima University.

### Materials

Reagents were obtained from the following sources: LPS from InvivoGen (San Diego, CA, USA); fluid thioglycollate medium from Nihon Pharmaceutical Co., Ltd. (Tokyo, Japan); RPMI 1640 medium, trypan blue, TaqMan<sup>®</sup> RNA-to-C<sub>T</sub><sup>™</sup> 1-Step Kit, and TaqMan<sup>®</sup> Gene Expression Assays from Life Technologies Co. (Carlsbad, CA, USA); fetal bovine serum (FBS) from BioWest (Nuaille, France); anti-mouse iNOS antibody from Becton, Dickinson and Company (Franklin Lakes, NJ, USA); anti-mouse  $\beta$ -tubulin antibody from Sigma-Aldrich Co. (St. Louis, MO, USA); ECL Western Blotting Detection Reagents from GE Healthcare UK Ltd. (Amersham, UK); Cell Counting Kit-8 from Dojindo Laboratories (Kumamoto, Japan); Griess Reagent System from Promega Co. (Madison, WI, USA); RNeasy Plus Mini Kit and QIAshredder from Qiagen (Hilden, Germany); and Mouse TNF- $\alpha$  Quantikine ELISA Kit from R&D systems (Minneapolis, MN, USA).

Poly(P) was prepared as described previously [23,24]. The purity of poly(P) was confirmed by HPLC gel filtration chromatography. HPLC was performed on a Shodex OHpak SB-803 HQ column using 100-mM NaCl solvent at a flow rate of 1.0 mL/min and a temperature of 25°C. Almost no tripolyphosphate, pyrophosphate, or Pi contaminated poly(P)<sub>14</sub>, poly(P)<sub>60</sub>, or poly(P)<sub>130</sub> (the average number of phosphate residues were 14, 60 and 130, respectively) based on chromatography chart showing the detected refractive index. In addition, we measured the Pi concentrations in poly(P)<sub>14</sub>, poly(P)<sub>60</sub>, and poly(P)<sub>130</sub> by the micro phosphate method using ascorbic acid and ammonium molybdate [25], and Pi concentrations were below the detection limit in all of the poly(P) samples. In this study, sodium phosphate buffer (as Pi) was used as a control for poly(P).

All other reagents were purchased from commercial sources and were of the highest available purity.

### Cell culture

One or two male C57BL/6J mice (8–12 weeks old) were used for each preparation of peritoneal macrophages. The mice were intraperitoneally injected with 3 mL of thioglycollate medium. After 3 days, peritoneal exudate cells were harvested from the peritoneal cavities. The cells were washed twice with RPMI 1640 and suspended in RPMI 1640 supplemented with 1% FBS. Aliquots of the cell suspensions were transferred to wells of 24-well plates ( $5 \times 10^5$  cells) or 60-mm diameter dishes ( $3 \times 10^6$  cells) and allowed to adhere for 2 h under 5% CO<sub>2</sub>/95% air at 37°C. Unattached cells were removed by rinsing with RPMI 1640 and the remaining adherent cells were used as macrophages for further experiments. The purity of macrophages was determined using anti-F4/80 immunostaining and was found to be more than 95%.

### iNOS detection by Western blotting

Macrophages plated in 60-mm diameter dishes in 3 mL of RPMI 1640 containing 1% FBS were pretreated with poly(P) for 5 min and stimulated with LPS for 24 h. In some experiments, macrophages were treated with poly(P) or LPS for 24 h. The cells

were then washed with phosphate-buffered saline, lysed by adding sodium dodecyl sulfate (SDS) sample buffer, and sonicated. After heating to 95°C for 5 min, the protein samples were separated by SDS-polyacrylamide gel electrophoresis and blotted onto polyvinylidene difluoride membranes. The membranes were blocked with blocking buffer containing 5% skim milk for 3 h at room temperature and incubated with primary antibody against iNOS and  $\beta$ -tubulin overnight at 4 °C. After washing, the membranes were further incubated with horseradish peroxidase-conjugated secondary antibody for 1 h at room temperature. The membranes were then incubated with ECL Western Blotting Detection Reagents, and immunoreactivity was detected using a luminescent image analyzer, LAS-1000plus (Fuji Photo Film, Tokyo, Japan). The band intensities were quantified using ImageJ (Rasband WS, ImageJ, U. S. National Institutes of Health, Bethesda, Maryland, USA, <http://imagej.nih.gov/ij/>, 1997–2012) and normalized to the levels of  $\beta$ -tubulin.

### Cell viability assays

Cell viability was assessed by 2-(2-methoxy-4-nitrophenyl)-3-(4-nitrophenyl)-5-(2,4-disulfophenyl)-2H-tetrazolium (WST-8) assays, based on the reduction of the tetrazolium salt WST-8 by dehydrogenase activities in living cells, using the Cell Counting Kit-8, according to the manufacturer's protocol. In brief, macrophages plated in 24-well plates in 0.4 mL of RPMI 1640 containing 1% FBS were pretreated with poly(P) for 5 min and stimulated with LPS for 24 h. On the other hand, macrophages were treated with H<sub>2</sub>O<sub>2</sub> (250  $\mu$ M) for 24 h, which was used as a positive control for cell death. Subsequently, 40  $\mu$ L of a mixed solution of WST-8 (5 mM) and 1-methoxy-5-methylphenazinium methylsulfate (0.2 mM) was added to each well. After incubation for 1 h, 100  $\mu$ L of the medium was transferred to a well of a 96-well plate and absorbance was measured at 450 nm.

Alternatively, a trypan blue exclusion assay was performed. Macrophages plated in 24-well plates in 0.4 mL of RPMI 1640 containing 1% FBS were pretreated with poly(P) for 5 min and stimulated with LPS for 24 h. Then, the cells were incubated with 0.4% trypan blue and gently rinsed with PBS. Unstained cells were counted in randomly selected fields under bright field microscopy.

### Nitrite assays

Nitrite, a metabolite of NO, was quantified using the Griess reaction to determine the amount of NO released by the cells. Macrophages plated in 24-well plates in 0.4 mL of RPMI 1640 containing 1% FBS were pretreated with poly(P) for 5 min and stimulated with LPS for 24 h. Nitrite was assayed in 50  $\mu$ L aliquots of the medium using the Griess Reagent System, according to the manufacturer's protocol.

### Real-time RT-PCR analysis of iNOS mRNA

Macrophages plated in 60-mm diameter dishes in 3 mL of RPMI 1640 containing 1% FBS were pretreated with poly(P) for 5 min and stimulated with LPS for 6 h. Total RNA was isolated from the cells using RNeasy Plus Mini Kit and QIAshredder, according to the manufacturer's protocol. The amount of total RNA was determined by light absorption at 260 nm and 280 nm. Real-time RT-PCR was performed using TaqMan<sup>®</sup> RNA-to-C<sub>T</sub><sup>™</sup> 1-Step Kit and TaqMan<sup>®</sup> Gene Expression Assays, according to the manufacturer's protocol. Assay IDs for iNOS and glyceraldehydes-3-phosphate dehydrogenase (GAPDH) were Mm00440502\_m1 and Mm99999915\_g1, respectively. Data were obtained and analyzed using an ABI PRISM<sup>®</sup> 7700 Sequence Detection System (Applied Biosystems, Foster City, CA, USA).

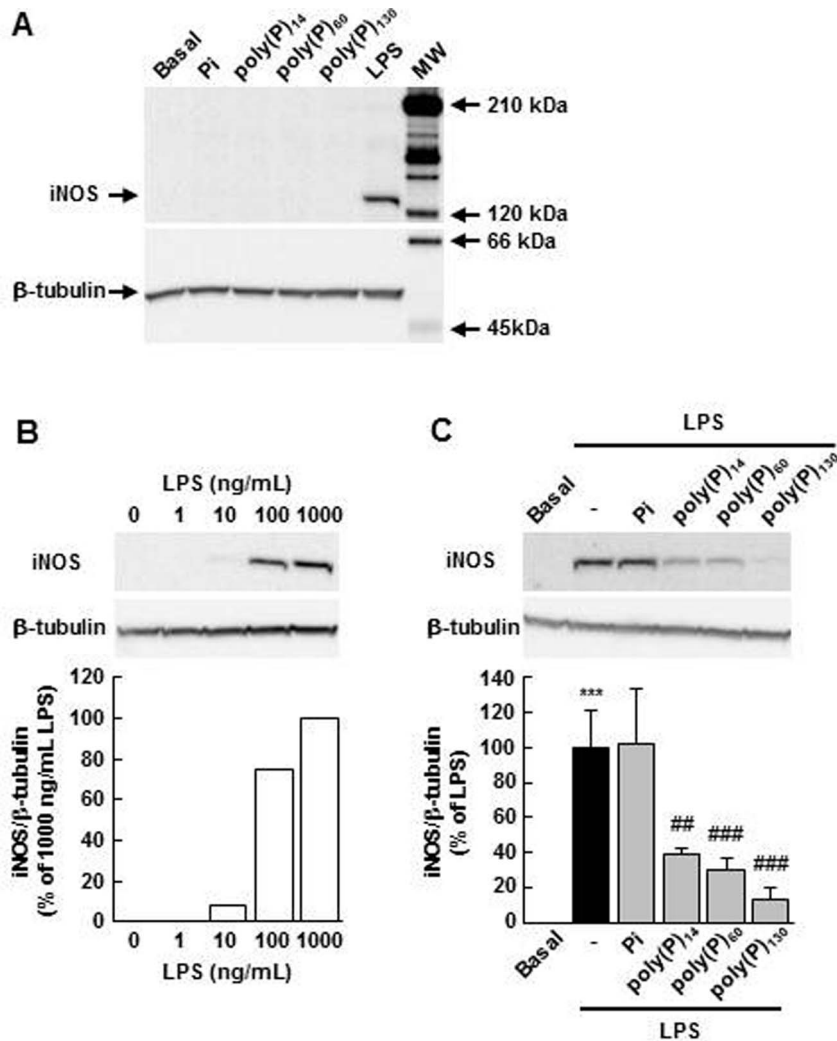

**Figure 1. The effects of poly(P) on iNOS expression in macrophages.** (A) poly(P) does not affect iNOS expression alone. The cells were treated with Pi, poly(P)<sub>14</sub>, poly(P)<sub>60</sub>, or poly(P)<sub>130</sub> (1 mM) for 24 h. iNOS expression was detected by Western blotting. LPS (100 ng/mL, 24 h) was used as a positive control. A similar result was obtained in another set of independent experiments. MW, molecular weight marker. (B) Concentration dependence of LPS-induced iNOS expression. The cells were treated with the indicated concentrations of LPS for 24 h. iNOS expression was detected by Western blotting (upper) and then quantified by densitometry (lower). A similar result was obtained in another set of independent experiments. (C) poly(P) suppresses LPS-induced iNOS expression. The cells were pretreated with Pi, poly(P)<sub>14</sub>, poly(P)<sub>60</sub>, or poly(P)<sub>130</sub> (1 mM) for 5 min and stimulated with LPS (100 ng/mL) for 24 h. iNOS expression was detected by Western blotting (upper) and then quantified by densitometry (lower). Values are expressed as means  $\pm$  SD of the percentage of iNOS expression compared with LPS alone from three independent experiments using different cell preparations. \*\*\* $p$ <0.001, significantly different from basal. ### $p$ <0.01, ### $p$ <0.001, significantly different from LPS alone (ANOVA with Bonferroni's post-test). doi:10.1371/journal.pone.0074650.g001

The expression levels of iNOS mRNA were normalized to that of GAPDH mRNA.

#### TNF assays

Macrophages plated in 24-well plates in 0.4 mL of RPMI 1640 containing 1% FBS were pretreated with poly(P) for 5 min and stimulated with LPS for 3 h or 24 h. TNF was assayed in 50  $\mu$ L aliquots of the medium using Mouse TNF-alpha Quantikine ELISA Kit, according to the manufacturer's protocol.

#### Statistical analysis

Statistical analysis of the data was performed using one-way analysis of variance (ANOVA) followed by pairwise comparisons using Bonferroni correction.

## Results

### Effects of poly(P) on LPS-induced iNOS protein expression in macrophages

We examined whether poly(P) could influence iNOS expression in macrophages using poly(P) of various chain lengths; the average number of phosphate residues were 14 [poly(P)<sub>14</sub>], 60 [poly(P)<sub>60</sub>], or 130 [poly(P)<sub>130</sub>]. None of these induced iNOS expression alone even at 1 mM [all poly(P) concentrations are presented in terms of phosphate residues], while a marked induction of iNOS was observed in LPS-stimulated macrophages (Figure 1A). In addition, the poly(P) degradation product Pi alone did not affect iNOS expression (Figure 1A). We next investigated whether poly(P) could modulate LPS-induced iNOS expression. In subsequent experi-

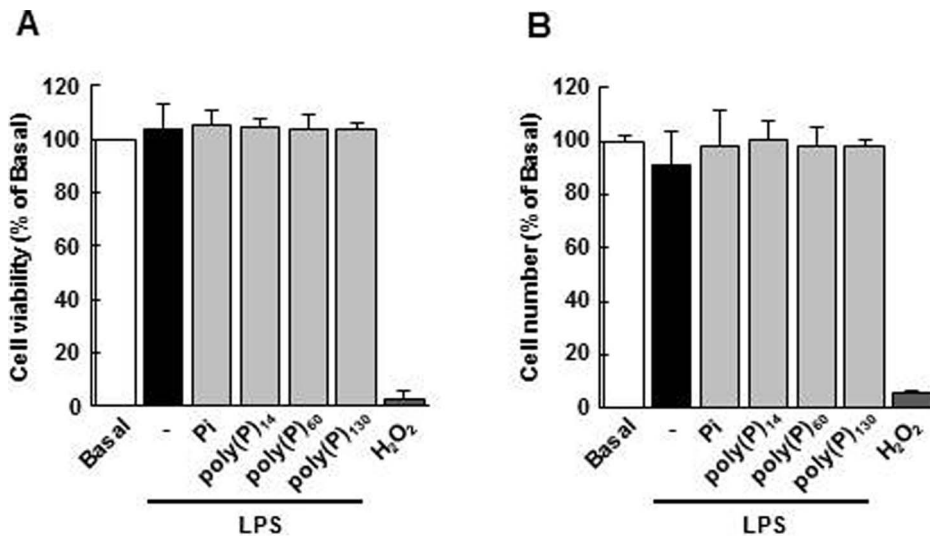

**Figure 2. The effects of poly(P) on the viability of macrophages.** The cells were pretreated with Pi, poly(P)<sub>14</sub>, poly(P)<sub>60</sub>, or poly(P)<sub>130</sub> (1 mM) for 5 min and stimulated with LPS (100 ng/mL) for 24 h. Cell viability was then determined using the WST-8 assay (A) and trypan blue exclusion assay (B). H<sub>2</sub>O<sub>2</sub> (250  $\mu$ M, 24 h) was used as a positive control. Values are expressed as means  $\pm$  SD of the percentage of cell viability (A) or cell number (B) compared with basal from three independent experiments using different cell preparations. doi:10.1371/journal.pone.0074650.g002

ments, we used 100 ng/mL LPS, which induced a submaximal expression of iNOS (Figure 1B). As shown in Figure 1C, poly(P)<sub>14</sub>, poly(P)<sub>60</sub>, and poly(P)<sub>130</sub> (1 mM) significantly reduced iNOS expression induced by LPS, although Pi exerted no such effect. The inhibition rates by poly(P)<sub>14</sub>, poly(P)<sub>60</sub>, and poly(P)<sub>130</sub> were  $61.7\% \pm 3.7\%$ ,  $69.9\% \pm 6.9\%$ , and  $87.4\% \pm 6.7\%$  (means  $\pm$  SD), respectively, suggesting that poly(P) with longer chains is more potent than those with shorter chains in suppressing LPS-induced iNOS expression.

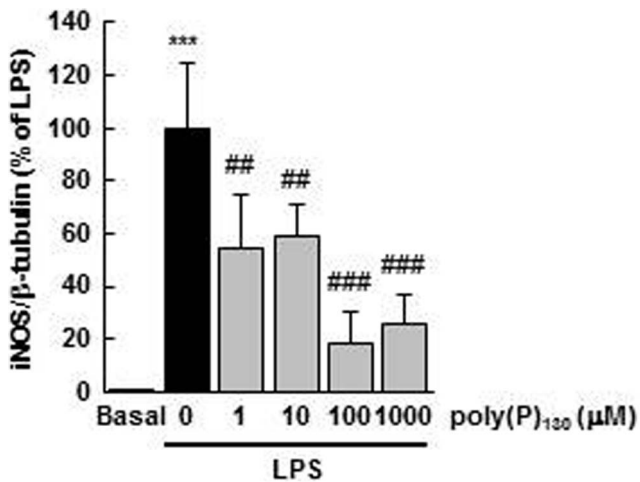

**Figure 3. Concentration-dependent suppression of LPS-induced iNOS expression by poly(P).** The cells were pretreated with the indicated concentrations of poly(P)<sub>130</sub> for 5 min and stimulated with LPS (100 ng/mL) for 24 h. iNOS expression was detected by Western blotting and then quantified by densitometry. Values are expressed as means  $\pm$  SD of the percentage of iNOS expression compared with LPS alone from three independent experiments using different cell preparations. \*\*\* $p$ <0.001, significantly different from basal. ## $p$ <0.01, ### $p$ <0.001, significantly different from LPS alone (ANOVA with Bonferroni's post-test). doi:10.1371/journal.pone.0074650.g003

To exclude the possibility that poly(P)-mediated suppression of iNOS expression was due to the death of macrophages, we tested whether poly(P) had any effect on cell viability using the WST-8

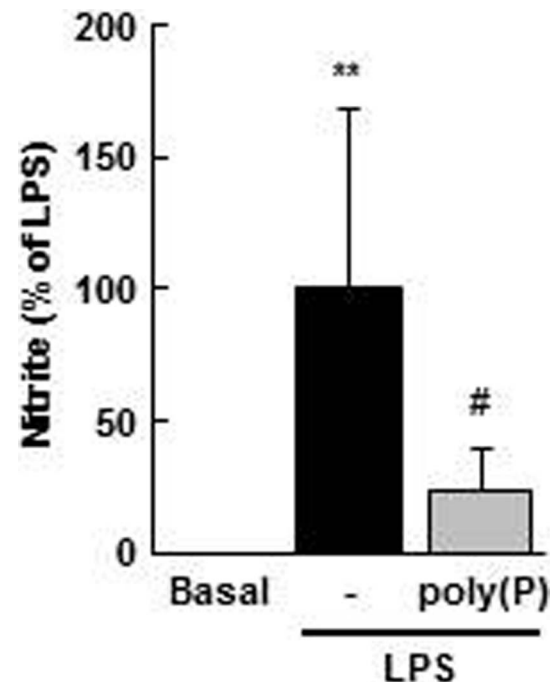

**Figure 4. poly(P) reduces LPS-induced NO release in macrophages.** The cells were pretreated with poly(P)<sub>130</sub> (100  $\mu$ M) for 5 min and stimulated with LPS (100 ng/mL) for 24 h. NO released (measured as nitrite) was determined by the Griess reaction. Values are expressed as means  $\pm$  SD of the percentage of nitrite compared with LPS alone from six independent experiments using different cell preparations. \*\* $p$ <0.01, significantly different from basal. # $p$ <0.05, significantly different from LPS alone (ANOVA with Bonferroni's post-test). doi:10.1371/journal.pone.0074650.g004

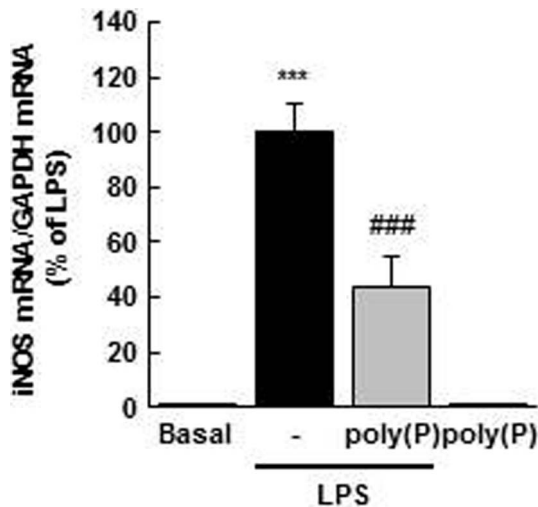

**Figure 5. poly(P) suppresses LPS-induced iNOS mRNA expression in macrophages.** The cells were pretreated with poly(P)<sub>130</sub> (100  $\mu$ M) for 5 min and stimulated with LPS (100 ng/mL) for 6 h. iNOS mRNA expression was quantified by real-time RT-PCR. Values are expressed as means  $\pm$  SD of the percentage of iNOS mRNA expression compared with LPS alone from three independent experiments using different cell preparations. \*\*\* $p$ <0.001, significantly different from basal. ### $p$ <0.001, significantly different from LPS alone (ANOVA with Bonferroni's post-test). doi:10.1371/journal.pone.0074650.g005

assay and trypan blue exclusion assay. As shown in Figure 2A, poly(P)<sub>14</sub>, poly(P)<sub>60</sub>, and poly(P)<sub>130</sub> as well as Pi (all at 1 mM) did not affect the viability of LPS-stimulated macrophages, whereas H<sub>2</sub>O<sub>2</sub>, a reactive oxygen species, caused cell death and decreased the formation of WST-8 formazan. Moreover, the number of trypan blue-negative cells did not change with the treatment with poly(P) (Figure 2B). These results indicate that poly(P) suppresses iNOS expression in LPS-stimulated macrophages by controlling cell function, but not cell viability.

#### Concentration dependence of poly(P)-mediated suppression on LPS-induced iNOS expression

In mammals, various tissues and cells contain micromolar concentrations of poly(P) [15,16,26]. Thus, we examined the concentration dependence of poly(P)-mediated suppression on LPS-induced iNOS expression. We observed that poly(P)<sub>130</sub> significantly reduced LPS-induced iNOS expression even at 1  $\mu$ M and exerted maximum inhibition at 100  $\mu$ M (Figure 3).

#### Effects of poly(P) on LPS-induced NO production

iNOS produces large amounts of NO from L-arginine. The amount of NO production is primarily regulated at the expression level of iNOS, but posttranslational modification is also involved. We therefore investigated whether poly(P)-mediated suppression of iNOS expression could lead to the reduction of NO release. As shown in Figure 4, treatment of LPS-stimulated macrophages with poly(P)<sub>130</sub> (100  $\mu$ M) resulted in decreased NO release similar to the case of iNOS expression.

#### Effects of poly(P) on LPS-induced iNOS mRNA expression

We then examined whether poly(P) affects the expression of iNOS mRNA. As shown in Figure 5, poly(P)<sub>130</sub> (100  $\mu$ M) treatment led to a significant decrease in iNOS mRNA expression induced by LPS, suggesting that poly(P) reduces LPS-induced

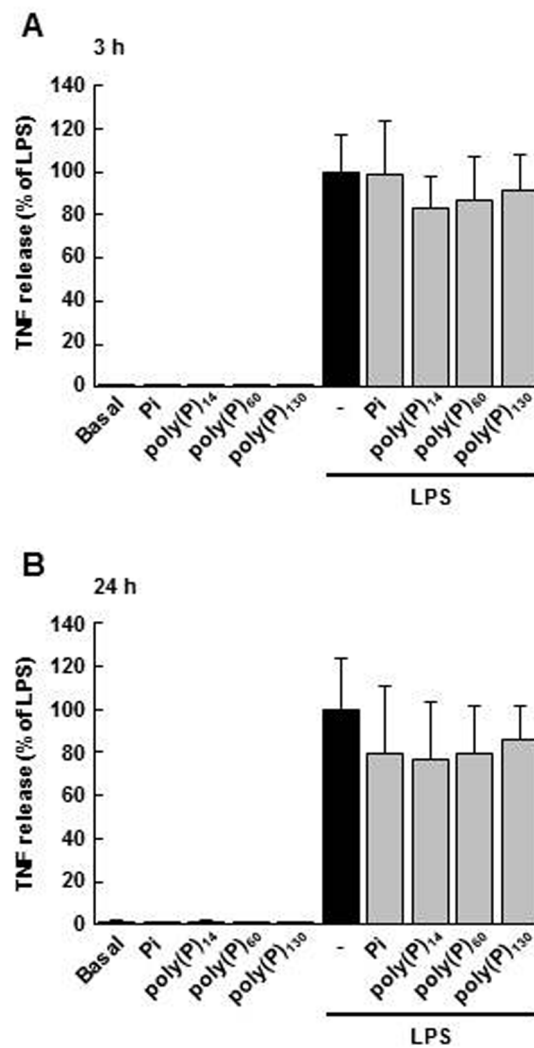

**Figure 6. Effects of poly(P) on LPS-induced TNF release.** The cells were pretreated with Pi, poly(P)<sub>14</sub>, poly(P)<sub>60</sub>, or poly(P)<sub>130</sub> (1 mM) for 5 min and stimulated with LPS (100 ng/mL) for 3 h (A) or 24 h (B). The released TNF was measured by ELISA. Values are expressed as means  $\pm$  SD of the percentage of TNF release compared with LPS alone from three independent experiments using different cell preparations. doi:10.1371/journal.pone.0074650.g006

iNOS expression at least in part by down-regulating the expression level of iNOS mRNA.

#### Effects of poly(P) on LPS-induced TNF release

In addition to iNOS, the activation of TLR4 by LPS causes the expression of various inflammatory mediators including TNF in macrophages [20]. Thus, we examined whether poly(P) could suppress TNF release from LPS-stimulated macrophages as well as iNOS expression. For the TNF assay, macrophages were pretreated with poly(P)<sub>14</sub>, poly(P)<sub>60</sub>, or poly(P)<sub>130</sub> for 5 min, and then stimulated with LPS, similar to iNOS. After the 3-h or 24-h stimulation with LPS, the amount of TNF released was significantly elevated. However, poly(P)<sub>14</sub>, poly(P)<sub>60</sub>, and poly(P)<sub>130</sub> did not have significant effects on LPS-induced TNF release (Figure 6A and B). Moreover, the 24-h pretreatment with poly(P) also did not suppress LPS (3 h)-induced TNF release (the percentage of TNF release compared with LPS: LPS + poly(P)<sub>14</sub>, 101.4%  $\pm$  13.3%; LPS + poly(P)<sub>60</sub>, 98.0%  $\pm$  17.1%; LPS +

poly(P)<sub>130</sub>, 101.7% ± 10.4%; mean ± SD; n = 3). Therefore, it seems that poly(P) does not inhibit all the macrophage responses to LPS.

## Discussion

In mammalian cells, poly(P) is ubiquitously present; it seems to exert various functions. Previous studies have shown that poly(P) is involved in blood coagulation [5–9], the function of channels [10,11], cell apoptosis [12], activation of mTOR [13], energy metabolism [14], and the differentiation and calcification of osteoblasts [3,4]. In this study, we further showed that extracellular inorganic poly(P) reduces iNOS expression induced by LPS stimulation in mouse peritoneal macrophages.

LPS is a cell wall component of Gram-negative bacteria and potently activates TLR4 thus inducing the expression of various inflammation-associated genes including iNOS. NO produced in macrophages in response to infection plays an important role in early defense responses of the innate immunity by killing pathogens. However, large amounts of NO may also induce the death of host cells. Thus, NO production must be tightly regulated. Our results indicate that poly(P) suppresses LPS-induced iNOS expression in macrophages. Therefore, poly(P) can serve as a negative modulator of NO production in response to infection. In addition, a recent study reported that poly(P) suppressed the induction of proinflammatory cytokines IL-1β and IL-6 in an experimental model of acute colitis [27]. Thus, poly(P) may modulate the production of these cytokines as well as NO upon infectious diseases.

In mammals, various lengths of poly(P) seem to be present in different tissues and cells. Reportedly, poly(P) observed in rodent heart, kidneys, lungs, liver and brain is 50–800 phosphate residues long [15]. In contrast, only relatively short chain lengths of poly(P), composed of 60–100 phosphate residues, accumulate in the granules of platelets and mast cells [7,17,26]. We showed that poly(P) exerts a suppressive effect on iNOS expression at lengths of 14 to 130 phosphate residues. Thus, it is possible that endogenous poly(P) suppresses LPS-induced iNOS expression. Microbial poly(P), which is hundreds to thousands of phosphate residues long, may also demonstrate this effect.

Endogenous poly(P) may serve as an intercellular signaling molecule in innate immunity. For example, platelets and mast cells store poly(P) in their granules and secrete it into the extracellular space when the cells are activated [7,17,26]. These poly(P)-

accumulating granules are similar to acidocalcisomes, which are acidic organelles containing calcium and poly(P) in prokaryotes and lower eukaryotes, and such organelles are likely to be present in other types of mammalian cells [28]. Thus, such packed poly(P) may be released into the extracellular space and affect the function of macrophages, thereby serving as an immune modulator. Further, as poly(P) seems to be ubiquitously present, it may be leaked from injured cells when the immune reaction is overwhelming. Such poly(P) may reflect the degree of tissue damage and regulate NO production to avoid further damage expansion. On the other hand, pathogens may actively secrete their own poly(P), which may help them to escape from NO-producing macrophages by inhibiting iNOS expression.

Although our results suggest that poly(P) suppresses LPS-induced iNOS expression by regulating the level of mRNA expression, detailed mechanisms remain yet to be elucidated. It has been reported that LPS-induced extracellular Ca<sup>2+</sup> influx enhances iNOS expression in macrophages [29,30]. Poly(P), a negatively charged polyanion, may bind with extracellular Ca<sup>2+</sup>, inhibit LPS-induced Ca<sup>2+</sup> influx, and result in a decreased expression of iNOS mRNA. On the other hand, extracellular poly(P) has been recently reported to modulate or activate receptors on the plasma membrane, such as the FGF, integrin, and P2Y<sub>1</sub> receptors [2,27,31]. Thus, poly(P) may regulate iNOS expression via such receptors. In addition, considering that TNF release was not affected by poly(P), poly(P) may modulate iNOS expression via a signaling pathway that is not involved in TNF production.

In conclusion, our results indicate that extracellular inorganic poly(P) can decrease LPS-induced iNOS expression in mouse peritoneal macrophages. This novel finding suggests a link between poly(P) and innate immunity.

## Acknowledgments

This work was performed using equipment at the Analysis Center of Life Science, Hiroshima University.

## Author Contributions

Conceived and designed the experiments: KH TS KD YA. Performed the experiments: KH TS. Analyzed the data: KH TS. Contributed reagents/materials/analysis tools: KH TS KM TK YM. Wrote the paper: KH AP YA.

## References

- Rao NN, Gómez-García MR, Kornberg A (2009) Inorganic polyphosphate: essential for growth and survival. *Annu Rev Biochem* 78: 605–647.
- Shiba T, Nishimura D, Kawazoe Y, Onodera Y, Tsutsumi K, et al. (2003) Modulation of mitogenic activity of fibroblast growth factors by inorganic polyphosphate. *J Biol Chem* 278: 26788–26792.
- Kawazoe Y, Shiba T, Nakamura R, Mizuno A, Tsutsumi K, et al. (2004) Induction of calcification in MC3T3-E1 cells by inorganic polyphosphate. *J Dent Res* 83: 613–618.
- Kawazoe Y, Katoh S, Onodera Y, Kohgo T, Shindoh M, et al. (2008) Activation of the FGF signaling pathway and subsequent induction of mesenchymal stem cell differentiation by inorganic polyphosphate. *Int J Biol Sci* 4: 37–47.
- Smith SA, Mutch NJ, Baskar D, Rohloff P, Docampo R, et al. (2006) Polyphosphate modulates blood coagulation and fibrinolysis. *Proc Natl Acad Sci U S A* 103: 903–908.
- Smith SA, Morrissey JH (2008) Polyphosphate enhances fibrin clot structure. *Blood* 112: 2810–2816.
- Müller F, Mutch NJ, Schenk WA, Smith SA, Esterl L, et al. (2009) Platelet polyphosphates are proinflammatory and procoagulant mediators in vivo. *Cell* 139: 1143–1156.
- Mutch NJ, Engel R, Uitte de Willige S, Philippou H, Ariens RA (2010) Polyphosphate modifies the fibrin network and down-regulates fibrinolysis by attenuating binding of tPA and plasminogen to fibrin. *Blood* 115: 3980–3988.
- Choi SH, Smith SA, Morrissey JH (2011) Polyphosphate is a cofactor for the activation of factor XI by thrombin. *Blood* 118: 6963–6970.
- Kim D, Cavanaugh EJ (2007) Requirement of a soluble intracellular factor for activation of transient receptor potential A1 by pungent chemicals: role of inorganic polyphosphates. *J Neurosci* 27: 6500–6509.
- Zakharian E, Thyagarajan B, French RJ, Pavlov E, Rohacs T (2009) Inorganic polyphosphate modulates TRPM8 channels. *PLoS One* 4: e5404.
- Hernandez-Ruiz L, González-García I, Castro C, Brivica JA, Ruiz FA (2006) Inorganic polyphosphate and specific induction of apoptosis in human plasma cells. *Haematologica* 91: 1180–1186.
- Wang L, Fraley CD, Faridi J, Kornberg A, Roth RA (2003) Inorganic polyphosphate stimulates mammalian TOR, a kinase involved in the proliferation of mammary cancer cells. *Proc Natl Acad Sci U S A* 100: 11249–11254.
- Pavlov E, Aschar-Sobbi R, Campanella M, Turner RJ, Gómez-García MR, et al. (2010) Inorganic polyphosphate and energy metabolism in mammalian cells. *J Biol Chem* 285: 9420–9428.
- Kumble KD, Kornberg A (1995) Inorganic polyphosphate in mammalian cells and tissues. *J Biol Chem* 270: 5818–5822.
- Leyhausen G, Lorenz B, Zhu H, Geurtsen W, Bohnsack R, et al. (1998) Inorganic polyphosphate in human osteoblast-like cells. *J Bone Miner Res* 13: 803–812.

17. Moreno-Sanchez D, Hernandez-Ruiz L, Ruiz FA, Docampo R (2012) Polyphosphate is a novel pro-inflammatory regulator of mast cells and is located in acidocalcisomes. *J Biol Chem* 287: 28435–28444.
18. Kawai T, Akira S (2011) Toll-like receptors and their crosstalk with other innate receptors in infection and immunity. *Immunity* 34: 637–650.
19. Kumar H, Kawai T, Akira S (2011) Pathogen recognition by the innate immune system. *Int Rev Immunol* 30: 16–34.
20. Kawai T, Akira S (2010) The role of pattern-recognition receptors in innate immunity: update on Toll-like receptors. *Nat Immunol* 11: 373–384.
21. Wink DA, Hines HB, Cheng RY, Switzer CH, Flores-Santana W, et al. (2011) Nitric oxide and redox mechanisms in the immune response. *J Leukoc Biol* 89: 873–891.
22. Pautz A, Art J, Hahn S, Nowag S, Voss C, et al. (2010) Regulation of the expression of inducible nitric oxide synthase. *Nitric Oxide* 23: 75–93.
23. Shiba T, Shiba T, Yamaoka M, Uematsu T, Takahashi Y, et al. (2003) Polyphosphate-water soluble collagen complexes and process for preparation thereof. Japanese Patent Number 4698932.
24. Shiba T, Takahashi Y, Uematsu T, Kawazoe Y, Ooi K, et al. (2004) Effect of inorganic polyphosphate on periodontal regeneration. *Key Engineering Materials* 254-2: 1119–1122.
25. Chen PS, Toribara TY, Warner H (1956) Microdetermination of phosphorus. *Anal Chem* 28: 1756–1758.
26. Ruiz FA, Lea CR, Oldfield E, Docampo R (2004) Human platelet dense granules contain polyphosphate and are similar to acidocalcisomes of bacteria and unicellular eukaryotes. *J Biol Chem* 279: 44250–44257.
27. Segawa S, Fujiya M, Konishi H, Ueno N, Kobayashi N, et al. (2011) Probiotic-derived polyphosphate enhances the epithelial barrier function and maintains intestinal homeostasis through integrin-p38 MAPK pathway. *PLoS One* 6: e23278.
28. Docampo R, Moreno SN (2011) Acidocalcisomes. *Cell Calcium* 50: 113–119.
29. Kim Y, Moon JS, Lee KS, Park SY, Cheong J, et al. (2004)  $Ca^{2+}$ /calmodulin-dependent protein phosphatase calcineurin mediates the expression of iNOS through IKK and NF- $\kappa$ B activity in LPS-stimulated mouse peritoneal macrophages and RAW 264.7 cells. *Biochem Biophys Res Commun* 314: 695–703.
30. Zhou X, Yang W, Li J (2006)  $Ca^{2+}$ - and protein kinase C-dependent signaling pathway for nuclear factor- $\kappa$ B activation, inducible nitric-oxide synthase expression, and tumor necrosis factor- $\alpha$  production in lipopolysaccharide-stimulated rat peritoneal macrophages. *J Biol Chem* 281: 31337–31347.
31. Holmström KM, Marina N, Baev AY, Wood NW, Gourine AV, et al. (2013) Signalling properties of inorganic polyphosphate in the mammalian brain. *Nat Commun* 4: 1362.
